# Supplementary material
Source: publisher site journal article supplement (http://bdj.pensoft.net//lib/ajax_srv/article_elements_srv.php?action=download_suppl_file&instance_id=750269)
Supplement: Supplementary file [file article_elements_srv.php]

# Language

Jun 1, 2008 - Jun 1, 2009

All Sessions  
100.00%

+ Add Segment

**Explorer**

Summary

| Language      | Acquisition                                             |                                                   |                                                         | Behavior                                          |                                                 |                                                       | Conversions                                     |                                           |                                                     |
|---------------|---------------------------------------------------------|---------------------------------------------------|---------------------------------------------------------|---------------------------------------------------|-------------------------------------------------|-------------------------------------------------------|-------------------------------------------------|-------------------------------------------|-----------------------------------------------------|
|               | Sessions                                                | % New Sessions                                    | New Users                                               | Bounce Rate                                       | Pages / Session                                 | Avg. Session Duration                                 | Goal Conversion Rate                            | Goal Completions                          | Goal Value                                          |
|               | 718,961<br><small>% of Total: 100.00% (718,961)</small> | 27.92%<br><small>Site Avg: 27.88% (0.15%)</small> | 200,740<br><small>% of Total: 100.15% (200,440)</small> | 27.09%<br><small>Site Avg: 27.09% (0.00%)</small> | 12.81<br><small>Site Avg: 12.81 (0.00%)</small> | 00:13:05<br><small>Site Avg: 00:13:05 (0.00%)</small> | 0.00%<br><small>Site Avg: 0.00% (0.00%)</small> | 0<br><small>% of Total: 0.00% (0)</small> | \$0.00<br><small>% of Total: 0.00% (\$0.00)</small> |
| 1. en-us      | 269,476 (37.48%)                                        | 29.89%                                            | 80,541 (40.12%)                                         | 28.31%                                            | 11.92                                           | 00:12:11                                              | 0.00%                                           | 0 (0.00%)                                 | \$0.00 (0.00%)                                      |
| 2. es         | 136,818 (19.03%)                                        | 21.46%                                            | 29,366 (14.63%)                                         | 26.48%                                            | 15.07                                           | 00:14:39                                              | 0.00%                                           | 0 (0.00%)                                 | \$0.00 (0.00%)                                      |
| 3. pt-br      | 103,352 (14.38%)                                        | 27.37%                                            | 28,290 (14.09%)                                         | 20.75%                                            | 13.76                                           | 00:13:56                                              | 0.00%                                           | 0 (0.00%)                                 | \$0.00 (0.00%)                                      |
| 4. fr         | 44,365 (6.17%)                                          | 29.40%                                            | 13,045 (6.50%)                                          | 31.82%                                            | 11.29                                           | 00:13:35                                              | 0.00%                                           | 0 (0.00%)                                 | \$0.00 (0.00%)                                      |
| 5. es-es      | 35,030 (4.87%)                                          | 24.33%                                            | 8,524 (4.25%)                                           | 22.40%                                            | 17.93                                           | 00:17:02                                              | 0.00%                                           | 0 (0.00%)                                 | \$0.00 (0.00%)                                      |
| 6. de         | 27,414 (3.81%)                                          | 31.63%                                            | 8,670 (4.32%)                                           | 28.77%                                            | 9.94                                            | 00:10:36                                              | 0.00%                                           | 0 (0.00%)                                 | \$0.00 (0.00%)                                      |
| 7. en         | 11,738 (1.63%)                                          | 25.52%                                            | 2,996 (1.49%)                                           | 27.74%                                            | 11.56                                           | 00:14:59                                              | 0.00%                                           | 0 (0.00%)                                 | \$0.00 (0.00%)                                      |
| 8. en-gb      | 10,509 (1.46%)                                          | 25.18%                                            | 2,646 (1.32%)                                           | 28.55%                                            | 10.03                                           | 00:12:57                                              | 0.00%                                           | 0 (0.00%)                                 | \$0.00 (0.00%)                                      |
| 9. zh-cn      | 9,968 (1.39%)                                           | 23.91%                                            | 2,383 (1.19%)                                           | 21.71%                                            | 11.24                                           | 00:13:44                                              | 0.00%                                           | 0 (0.00%)                                 | \$0.00 (0.00%)                                      |
| 10. zh-tw     | 8,071 (1.12%)                                           | 17.17%                                            | 1,386 (0.69%)                                           | 27.25%                                            | 7.77                                            | 00:13:10                                              | 0.00%                                           | 0 (0.00%)                                 | \$0.00 (0.00%)                                      |
| 11. it        | 6,889 (0.96%)                                           | 38.76%                                            | 2,670 (1.33%)                                           | 30.80%                                            | 13.46                                           | 00:11:12                                              | 0.00%                                           | 0 (0.00%)                                 | \$0.00 (0.00%)                                      |
| 12. es-ar     | 6,213 (0.86%)                                           | 21.76%                                            | 1,352 (0.67%)                                           | 18.62%                                            | 16.90                                           | 00:17:13                                              | 0.00%                                           | 0 (0.00%)                                 | \$0.00 (0.00%)                                      |
| 13. nl        | 5,396 (0.75%)                                           | 41.49%                                            | 2,239 (1.12%)                                           | 39.20%                                            | 9.37                                            | 00:06:54                                              | 0.00%                                           | 0 (0.00%)                                 | \$0.00 (0.00%)                                      |
| 14. ru        | 5,337 (0.74%)                                           | 47.70%                                            | 2,546 (1.27%)                                           | 49.92%                                            | 6.57                                            | 00:06:01                                              | 0.00%                                           | 0 (0.00%)                                 | \$0.00 (0.00%)                                      |
| 15. ko        | 4,901 (0.68%)                                           | 21.69%                                            | 1,063 (0.53%)                                           | 20.38%                                            | 13.92                                           | 00:12:54                                              | 0.00%                                           | 0 (0.00%)                                 | \$0.00 (0.00%)                                      |
| 16. ja        | 4,674 (0.65%)                                           | 42.34%                                            | 1,979 (0.99%)                                           | 29.70%                                            | 8.23                                            | 00:05:51                                              | 0.00%                                           | 0 (0.00%)                                 | \$0.00 (0.00%)                                      |
| 17. pl        | 4,607 (0.64%)                                           | 38.68%                                            | 1,782 (0.89%)                                           | 37.27%                                            | 11.18                                           | 00:09:46                                              | 0.00%                                           | 0 (0.00%)                                 | \$0.00 (0.00%)                                      |
| 18. sv        | 2,795 (0.39%)                                           | 28.19%                                            | 788 (0.39%)                                             | 27.58%                                            | 10.11                                           | 00:12:03                                              | 0.00%                                           | 0 (0.00%)                                 | \$0.00 (0.00%)                                      |
| 19. cs        | 2,655 (0.37%)                                           | 48.96%                                            | 1,300 (0.65%)                                           | 40.45%                                            | 11.11                                           | 00:08:18                                              | 0.00%                                           | 0 (0.00%)                                 | \$0.00 (0.00%)                                      |
| 20. sv-se     | 1,992 (0.28%)                                           | 22.24%                                            | 443 (0.22%)                                             | 16.37%                                            | 12.06                                           | 00:12:34                                              | 0.00%                                           | 0 (0.00%)                                 | \$0.00 (0.00%)                                      |
| 21. fr-fr     | 1,577 (0.22%)                                           | 17.95%                                            | 283 (0.14%)                                             | 26.82%                                            | 14.60                                           | 00:12:21                                              | 0.00%                                           | 0 (0.00%)                                 | \$0.00 (0.00%)                                      |
| 22. pt        | 1,566 (0.22%)                                           | 45.59%                                            | 714 (0.36%)                                             | 32.50%                                            | 7.02                                            | 00:06:41                                              | 0.00%                                           | 0 (0.00%)                                 | \$0.00 (0.00%)                                      |
| 23. da        | 1,262 (0.18%)                                           | 44.77%                                            | 565 (0.28%)                                             | 39.06%                                            | 5.92                                            | 00:06:21                                              | 0.00%                                           | 0 (0.00%)                                 | \$0.00 (0.00%)                                      |
| 24. de-de     | 1,240 (0.17%)                                           | 32.82%                                            | 407 (0.20%)                                             | 20.24%                                            | 12.09                                           | 00:10:54                                              | 0.00%                                           | 0 (0.00%)                                 | \$0.00 (0.00%)                                      |
| 25. tr        | 1,207 (0.17%)                                           | 63.21%                                            | 763 (0.38%)                                             | 44.74%                                            | 5.53                                            | 00:04:37                                              | 0.00%                                           | 0 (0.00%)                                 | \$0.00 (0.00%)                                      |
| 26. ca        | 971 (0.14%)                                             | 7.93%                                             | 77 (0.04%)                                              | 22.66%                                            | 12.09                                           | 00:22:22                                              | 0.00%                                           | 0 (0.00%)                                 | \$0.00 (0.00%)                                      |
| 27. pt-pt     | 773 (0.11%)                                             | 37.00%                                            | 286 (0.14%)                                             | 23.80%                                            | 12.72                                           | 00:11:31                                              | 0.00%                                           | 0 (0.00%)                                 | \$0.00 (0.00%)                                      |
| 28. hu        | 746 (0.10%)                                             | 74.26%                                            | 554 (0.28%)                                             | 61.66%                                            | 3.24                                            | 00:01:39                                              | 0.00%                                           | 0 (0.00%)                                 | \$0.00 (0.00%)                                      |
| 29. ja-jp     | 574 (0.08%)                                             | 32.75%                                            | 188 (0.09%)                                             | 31.01%                                            | 13.11                                           | 00:07:26                                              | 0.00%                                           | 0 (0.00%)                                 | \$0.00 (0.00%)                                      |
| 30. ja-jp-mac | 551 (0.08%)                                             | 11.07%                                            | 61 (0.03%)                                              | 10.34%                                            | 25.66                                           | 00:17:25                                              | 0.00%                                           | 0 (0.00%)                                 | \$0.00 (0.00%)                                      |
| 31. fi        | 536 (0.07%)                                             | 62.69%                                            | 336 (0.17%)                                             | 41.79%                                            | 5.83                                            | 00:03:43                                              | 0.00%                                           | 0 (0.00%)                                 | \$0.00 (0.00%)                                      |
| 32. es-419    | 466 (0.06%)                                             | 19.74%                                            | 92 (0.05%)                                              | 18.03%                                            | 13.18                                           | 00:15:22                                              | 0.00%                                           | 0 (0.00%)                                 | \$0.00 (0.00%)                                      |

| Rank | Country/Region                                      | Visitors    | Percentage | Visitors    | Percentage | Visitors | Percentage | Visitors | Percentage | Visitors       | Percentage |
|------|-----------------------------------------------------|-------------|------------|-------------|------------|----------|------------|----------|------------|----------------|------------|
| 33.  | <a href="#">es-la</a>                               | 452 (0.06%) | 22.12%     | 100 (0.05%) | 37.39%     | 23.75    | 00:14:18   | 0.00%    | 0 (0.00%)  | \$0.00 (0.00%) |            |
| 34.  | <a href="#">sk</a>                                  | 409 (0.06%) | 64.79%     | 265 (0.13%) | 61.37%     | 3.58     | 00:01:39   | 0.00%    | 0 (0.00%)  | \$0.00 (0.00%) |            |
| 35.  | <a href="#">de-at</a>                               | 397 (0.06%) | 35.01%     | 139 (0.07%) | 12.09%     | 11.40    | 00:10:57   | 0.00%    | 0 (0.00%)  | \$0.00 (0.00%) |            |
| 36.  | <a href="#">no</a>                                  | 395 (0.05%) | 51.90%     | 205 (0.10%) | 37.22%     | 6.87     | 00:05:22   | 0.00%    | 0 (0.00%)  | \$0.00 (0.00%) |            |
| 37.  | <a href="#">el</a>                                  | 385 (0.05%) | 75.84%     | 292 (0.15%) | 62.08%     | 2.93     | 00:01:43   | 0.00%    | 0 (0.00%)  | \$0.00 (0.00%) |            |
| 38.  | <a href="#">fr-ca</a>                               | 368 (0.05%) | 1.09%      | 4 (0.00%)   | 21.74%     | 35.19    | 00:44:26   | 0.00%    | 0 (0.00%)  | \$0.00 (0.00%) |            |
| 39.  | <a href="#">it-it</a>                               | 296 (0.04%) | 39.19%     | 116 (0.06%) | 31.08%     | 7.92     | 00:08:55   | 0.00%    | 0 (0.00%)  | \$0.00 (0.00%) |            |
| 40.  | <a href="#">nb-no</a>                               | 288 (0.04%) | 20.14%     | 58 (0.03%)  | 74.65%     | 3.14     | 00:03:20   | 0.00%    | 0 (0.00%)  | \$0.00 (0.00%) |            |
| 41.  | <a href="#">ru; alexa toolbar</a>                   | 228 (0.03%) | 0.44%      | 1 (0.00%)   | 68.42%     | 6.63     | 00:14:26   | 0.00%    | 0 (0.00%)  | \$0.00 (0.00%) |            |
| 42.  | <a href="#">sl</a>                                  | 182 (0.03%) | 61.54%     | 112 (0.06%) | 67.58%     | 2.26     | 00:01:04   | 0.00%    | 0 (0.00%)  | \$0.00 (0.00%) |            |
| 43.  | <a href="#">nl-nl</a>                               | 165 (0.02%) | 44.24%     | 73 (0.04%)  | 31.52%     | 6.61     | 00:10:47   | 0.00%    | 0 (0.00%)  | \$0.00 (0.00%) |            |
| 44.  | <a href="#">bg</a>                                  | 159 (0.02%) | 66.67%     | 106 (0.05%) | 54.72%     | 8.99     | 00:04:31   | 0.00%    | 0 (0.00%)  | \$0.00 (0.00%) |            |
| 45.  | <a href="#">he</a>                                  | 121 (0.02%) | 68.60%     | 83 (0.04%)  | 74.38%     | 1.87     | 00:00:18   | 0.00%    | 0 (0.00%)  | \$0.00 (0.00%) |            |
| 46.  | <a href="#">ar-sa</a>                               | 120 (0.02%) | 81.67%     | 98 (0.05%)  | 69.17%     | 2.41     | 00:01:32   | 0.00%    | 0 (0.00%)  | \$0.00 (0.00%) |            |
| 47.  | <a href="#">et</a>                                  | 116 (0.02%) | 24.14%     | 28 (0.01%)  | 31.90%     | 14.62    | 00:17:29   | 0.00%    | 0 (0.00%)  | \$0.00 (0.00%) |            |
| 48.  | <a href="#">th</a>                                  | 108 (0.02%) | 35.19%     | 38 (0.02%)  | 16.67%     | 11.78    | 00:13:51   | 0.00%    | 0 (0.00%)  | \$0.00 (0.00%) |            |
| 49.  | <a href="#">pl-pl</a>                               | 99 (0.01%)  | 35.35%     | 35 (0.02%)  | 28.28%     | 5.53     | 00:05:47   | 0.00%    | 0 (0.00%)  | \$0.00 (0.00%) |            |
| 50.  | <a href="#">lt</a>                                  | 97 (0.01%)  | 71.13%     | 69 (0.03%)  | 73.20%     | 1.97     | 00:00:59   | 0.00%    | 0 (0.00%)  | \$0.00 (0.00%) |            |
| 51.  | <a href="#">(not set)</a>                           | 85 (0.01%)  | 65.88%     | 56 (0.03%)  | 24.71%     | 5.72     | 00:08:32   | 0.00%    | 0 (0.00%)  | \$0.00 (0.00%) |            |
| 52.  | <a href="#">ro</a>                                  | 85 (0.01%)  | 84.71%     | 72 (0.04%)  | 64.71%     | 6.38     | 00:02:43   | 0.00%    | 0 (0.00%)  | \$0.00 (0.00%) |            |
| 53.  | <a href="#">id</a>                                  | 73 (0.01%)  | 68.49%     | 50 (0.02%)  | 39.73%     | 3.66     | 00:03:46   | 0.00%    | 0 (0.00%)  | \$0.00 (0.00%) |            |
| 54.  | <a href="#">cs-cz</a>                               | 60 (0.01%)  | 71.67%     | 43 (0.02%)  | 41.67%     | 5.35     | 00:02:14   | 0.00%    | 0 (0.00%)  | \$0.00 (0.00%) |            |
| 55.  | <a href="#">pt-br; alexa</a>                        | 57 (0.01%)  | 43.86%     | 25 (0.01%)  | 15.79%     | 17.02    | 00:14:20   | 0.00%    | 0 (0.00%)  | \$0.00 (0.00%) |            |
| 56.  | <a href="#">hr</a>                                  | 48 (0.01%)  | 91.67%     | 44 (0.02%)  | 68.75%     | 4.52     | 00:01:39   | 0.00%    | 0 (0.00%)  | \$0.00 (0.00%) |            |
| 57.  | <a href="#">gl</a>                                  | 46 (0.01%)  | 6.52%      | 3 (0.00%)   | 15.22%     | 9.35     | 00:21:17   | 0.00%    | 0 (0.00%)  | \$0.00 (0.00%) |            |
| 58.  | <a href="#">zh-hk</a>                               | 44 (0.01%)  | 63.64%     | 28 (0.01%)  | 31.82%     | 29.82    | 00:08:22   | 0.00%    | 0 (0.00%)  | \$0.00 (0.00%) |            |
| 59.  | <a href="#">ru-ru</a>                               | 38 (0.01%)  | 68.42%     | 26 (0.01%)  | 73.68%     | 1.79     | 00:00:24   | 0.00%    | 0 (0.00%)  | \$0.00 (0.00%) |            |
| 60.  | <a href="#">es-xl</a>                               | 36 (0.01%)  | 5.56%      | 2 (0.00%)   | 8.33%      | 22.78    | 00:33:26   | 0.00%    | 0 (0.00%)  | \$0.00 (0.00%) |            |
| 61.  | <a href="#">hu-hu</a>                               | 24 (0.00%)  | 54.17%     | 13 (0.01%)  | 66.67%     | 2.21     | 00:01:30   | 0.00%    | 0 (0.00%)  | \$0.00 (0.00%) |            |
| 62.  | <a href="#">uk</a>                                  | 24 (0.00%)  | 75.00%     | 18 (0.01%)  | 54.17%     | 4.12     | 00:04:12   | 0.00%    | 0 (0.00%)  | \$0.00 (0.00%) |            |
| 63.  | <a href="#">lv</a>                                  | 23 (0.00%)  | 69.57%     | 16 (0.01%)  | 91.30%     | 1.13     | 00:00:07   | 0.00%    | 0 (0.00%)  | \$0.00 (0.00%) |            |
| 64.  | <a href="#">da-dk</a>                               | 20 (0.00%)  | 75.00%     | 15 (0.01%)  | 55.00%     | 3.45     | 00:00:38   | 0.00%    | 0 (0.00%)  | \$0.00 (0.00%) |            |
| 65.  | <a href="#">pt_br</a>                               | 19 (0.00%)  | 10.53%     | 2 (0.00%)   | 5.26%      | 4.79     | 00:01:08   | 0.00%    | 0 (0.00%)  | \$0.00 (0.00%) |            |
| 66.  | <a href="#">he-il</a>                               | 18 (0.00%)  | 5.56%      | 1 (0.00%)   | 11.11%     | 8.56     | 00:07:20   | 0.00%    | 0 (0.00%)  | \$0.00 (0.00%) |            |
| 67.  | <a href="#">fi-fi</a>                               | 15 (0.00%)  | 73.33%     | 11 (0.01%)  | 40.00%     | 9.60     | 00:06:06   | 0.00%    | 0 (0.00%)  | \$0.00 (0.00%) |            |
| 68.  | <a href="#">en_us</a>                               | 14 (0.00%)  | 85.71%     | 12 (0.01%)  | 57.14%     | 5.00     | 00:05:56   | 0.00%    | 0 (0.00%)  | \$0.00 (0.00%) |            |
| 69.  | <a href="#">nb</a>                                  | 14 (0.00%)  | 92.86%     | 13 (0.01%)  | 64.29%     | 4.64     | 00:02:33   | 0.00%    | 0 (0.00%)  | \$0.00 (0.00%) |            |
| 70.  | <a href="#">ar</a>                                  | 13 (0.00%)  | 100.00%    | 13 (0.01%)  | 84.62%     | 1.85     | 00:00:17   | 0.00%    | 0 (0.00%)  | \$0.00 (0.00%) |            |
| 71.  | <a href="#">es-mx</a>                               | 12 (0.00%)  | 33.33%     | 4 (0.00%)   | 16.67%     | 5.08     | 00:02:40   | 0.00%    | 0 (0.00%)  | \$0.00 (0.00%) |            |
| 72.  | <a href="#">sr</a>                                  | 10 (0.00%)  | 100.00%    | 10 (0.00%)  | 50.00%     | 3.00     | 00:00:18   | 0.00%    | 0 (0.00%)  | \$0.00 (0.00%) |            |
| 73.  | <a href="#">el-gr</a>                               | 9 (0.00%)   | 77.78%     | 7 (0.00%)   | 55.56%     | 2.44     | 00:02:59   | 0.00%    | 0 (0.00%)  | \$0.00 (0.00%) |            |
| 74.  | <a href="#">mn</a>                                  | 9 (0.00%)   | 100.00%    | 9 (0.00%)   | 44.44%     | 1.78     | 00:00:27   | 0.00%    | 0 (0.00%)  | \$0.00 (0.00%) |            |
| 75.  | <a href="#">th-th</a>                               | 7 (0.00%)   | 71.43%     | 5 (0.00%)   | 85.71%     | 1.14     | 00:00:01   | 0.00%    | 0 (0.00%)  | \$0.00 (0.00%) |            |
| 76.  | <a href="#">vi</a>                                  | 7 (0.00%)   | 42.86%     | 3 (0.00%)   | 14.29%     | 29.14    | 00:29:33   | 0.00%    | 0 (0.00%)  | \$0.00 (0.00%) |            |
| 77.  | <a href="#">ca-ad</a>                               | 6 (0.00%)   | 50.00%     | 3 (0.00%)   | 16.67%     | 4.67     | 00:00:50   | 0.00%    | 0 (0.00%)  | \$0.00 (0.00%) |            |
| 78.  | <a href="#">zh-cn; alexa toolbar; alexa toolbar</a> | 6 (0.00%)   | 100.00%    | 6 (0.00%)   | 00.00%     | 1.50     | 00:01:07   | 0.00%    | 0 (0.00%)  | \$0.00 (0.00%) |            |

|      |                                                                |                  |         |                  |         |       |          |       |           |                |
|------|----------------------------------------------------------------|------------------|---------|------------------|---------|-------|----------|-------|-----------|----------------|
| 78.  | <a href="#">chrome://navigator/locale/navigator.properties</a> | <b>6</b> (0.00%) | 100.00% | <b>6</b> (0.00%) | 83.33%  | 1.50  | 00:01:07 | 0.00% | 0 (0.00%) | \$0.00 (0.00%) |
| 79.  | <a href="#">mk</a>                                             | <b>6</b> (0.00%) | 83.33%  | <b>5</b> (0.00%) | 50.00%  | 8.50  | 00:02:15 | 0.00% | 0 (0.00%) | \$0.00 (0.00%) |
| 80.  | <a href="#">sl-si</a>                                          | <b>6</b> (0.00%) | 83.33%  | <b>5</b> (0.00%) | 100.00% | 1.00  | 00:00:00 | 0.00% | 0 (0.00%) | \$0.00 (0.00%) |
| 81.  | <a href="#">en-ca</a>                                          | <b>5</b> (0.00%) | 80.00%  | <b>4</b> (0.00%) | 40.00%  | 2.00  | 00:00:08 | 0.00% | 0 (0.00%) | \$0.00 (0.00%) |
| 82.  | <a href="#">eu</a>                                             | <b>5</b> (0.00%) | 80.00%  | <b>4</b> (0.00%) | 80.00%  | 2.00  | 00:00:25 | 0.00% | 0 (0.00%) | \$0.00 (0.00%) |
| 83.  | <a href="#">de-ch</a>                                          | <b>4</b> (0.00%) | 100.00% | <b>4</b> (0.00%) | 75.00%  | 3.50  | 00:10:45 | 0.00% | 0 (0.00%) | \$0.00 (0.00%) |
| 84.  | <a href="#">en-au</a>                                          | <b>4</b> (0.00%) | 50.00%  | <b>2</b> (0.00%) | 50.00%  | 3.25  | 00:04:28 | 0.00% | 0 (0.00%) | \$0.00 (0.00%) |
| 85.  | <a href="#">ga-ie</a>                                          | <b>4</b> (0.00%) | 100.00% | <b>4</b> (0.00%) | 75.00%  | 1.25  | 00:00:06 | 0.00% | 0 (0.00%) | \$0.00 (0.00%) |
| 86.  | <a href="#">ko-kr</a>                                          | <b>4</b> (0.00%) | 75.00%  | <b>3</b> (0.00%) | 50.00%  | 1.75  | 00:00:08 | 0.00% | 0 (0.00%) | \$0.00 (0.00%) |
| 87.  | <a href="#">it-it</a>                                          | <b>3</b> (0.00%) | 33.33%  | <b>1</b> (0.00%) | 100.00% | 1.00  | 00:00:00 | 0.00% | 0 (0.00%) | \$0.00 (0.00%) |
| 88.  | <a href="#">tr-tr</a>                                          | <b>3</b> (0.00%) | 33.33%  | <b>1</b> (0.00%) | 33.33%  | 32.00 | 00:11:31 | 0.00% | 0 (0.00%) | \$0.00 (0.00%) |
| 89.  | <a href="#">bg-bg</a>                                          | <b>2</b> (0.00%) | 100.00% | <b>2</b> (0.00%) | 50.00%  | 2.00  | 00:00:12 | 0.00% | 0 (0.00%) | \$0.00 (0.00%) |
| 90.  | <a href="#">c</a>                                              | <b>2</b> (0.00%) | 100.00% | <b>2</b> (0.00%) | 50.00%  | 1.50  | 00:00:38 | 0.00% | 0 (0.00%) | \$0.00 (0.00%) |
| 91.  | <a href="#">ca-es</a>                                          | <b>2</b> (0.00%) | 100.00% | <b>2</b> (0.00%) | 100.00% | 1.00  | 00:00:00 | 0.00% | 0 (0.00%) | \$0.00 (0.00%) |
| 92.  | <a href="#">en-us; megaupload 1.0</a>                          | <b>2</b> (0.00%) | 100.00% | <b>2</b> (0.00%) | 0.00%   | 14.00 | 00:04:42 | 0.00% | 0 (0.00%) | \$0.00 (0.00%) |
| 93.  | <a href="#">et-ee</a>                                          | <b>2</b> (0.00%) | 100.00% | <b>2</b> (0.00%) | 50.00%  | 2.00  | 00:00:12 | 0.00% | 0 (0.00%) | \$0.00 (0.00%) |
| 94.  | <a href="#">gl-es</a>                                          | <b>2</b> (0.00%) | 50.00%  | <b>1</b> (0.00%) | 50.00%  | 3.00  | 00:00:20 | 0.00% | 0 (0.00%) | \$0.00 (0.00%) |
| 95.  | <a href="#">is</a>                                             | <b>2</b> (0.00%) | 100.00% | <b>2</b> (0.00%) | 0.00%   | 2.50  | 00:00:29 | 0.00% | 0 (0.00%) | \$0.00 (0.00%) |
| 96.  | <a href="#">pt-br;alexa</a>                                    | <b>2</b> (0.00%) | 100.00% | <b>2</b> (0.00%) | 0.00%   | 4.50  | 00:12:42 | 0.00% | 0 (0.00%) | \$0.00 (0.00%) |
| 97.  | <a href="#">af-za</a>                                          | <b>1</b> (0.00%) | 100.00% | <b>1</b> (0.00%) | 0.00%   | 6.00  | 00:02:13 | 0.00% | 0 (0.00%) | \$0.00 (0.00%) |
| 98.  | <a href="#">cy-gb</a>                                          | <b>1</b> (0.00%) | 100.00% | <b>1</b> (0.00%) | 100.00% | 1.00  | 00:00:00 | 0.00% | 0 (0.00%) | \$0.00 (0.00%) |
| 99.  | <a href="#">en-br; alexa</a>                                   | <b>1</b> (0.00%) | 100.00% | <b>1</b> (0.00%) | 0.00%   | 90.00 | 00:48:17 | 0.00% | 0 (0.00%) | \$0.00 (0.00%) |
| 100. | <a href="#">en-br;alexa</a>                                    | <b>1</b> (0.00%) | 100.00% | <b>1</b> (0.00%) | 100.00% | 1.00  | 00:00:00 | 0.00% | 0 (0.00%) | \$0.00 (0.00%) |

Rows 1 - 100 of 121
